# Supplementary material for: Four novel mutations in the ALPL gene in Chinese patients with odonto, childhood, and adult hypophosphatasia
Source: PubMed Central journal article supplement (PMC6131208; doi:10.1042/bsr20171377), 2018-08-29
Supplement: bsr20171377_Supp1.pdf [file bsr20171377_Supp1.pdf]

**Table S1.** Primer sequences used to amplify the 12 *ALPL* gene.

| Exon | Orientation | Sequence                | Length (bp) | AT (°C) |
|------|-------------|-------------------------|-------------|---------|
| 1F   | Forward     | CACAGAGACAGACGCCAGA     | 640         | 63.6    |
| 1R   | Reverse     | CCCTGCCATTAAAGTTCAACC   |             |         |
| 2F   | Forward     | GCAGCATGGAACTCATTGACA   | 549         | 55      |
| 2R   | Reverse     | ACTAACACATGCAAGTAGCAGG  |             |         |
| 3F   | Forward     | CAACTATTGCACCCACCTCC    | 364         | 56      |
| 3R   | Reverse     | ACACCCTTCCTCCAGAGCC     |             |         |
| 4F   | Forward     | CCCGAGCCTGCCTTGGTA      | 444         | 54      |
| 4R   | Reverse     | GCCTGGGCAACAGAGCAA      |             |         |
| 5F   | Forward     | TGGTCAAGGCTATGGGGTCC    | 467         | 60      |
| 5R   | Reverse     | CCCCTGTCACGGAAGGAATC    |             |         |
| 6F   | Forward     | GGAAGGGGCTAGAAAAGG      | 967         | 57.5    |
| 6R   | Reverse     | CAACCGCAAATCCCCTAATG    |             |         |
| 7F   | Forward     | ATCAGCTCCTCCAATATCCC    | 487         | 55      |
| 7R   | Reverse     | ATTTCCGATGCCCTTTCTAC    |             |         |
| 8F   | Forward     | GTGAGGGAAGGAAACAAGTAAAG | 351         | 57      |
| 8R   | Reverse     | GCCTAATTCCAGGAACCAGA    |             |         |
| 9F   | Forward     | CCCAGCCACCATACTCTACCC   | 383         | 60      |
| 9R   | Reverse     | CTACAGTGCCACCCGTCTCC    |             |         |
| 10F  | Forward     | GTCAGGTTGAATGGCTGCGTAA  | 422         | 60      |
| 10R  | Reverse     | GCTCTGGGCTTGCTGGCTCT    |             |         |
| 11F  | Forward     | GAAGATCCCAGGGGTTACCA    | 506         | 56      |
| 11R  | Reverse     | GGTCATTCAGACAACCGTCA    |             |         |

---

|     |         |                     |     |    |
|-----|---------|---------------------|-----|----|
| 12F | Forward | ATTCAAGCCAGCCTGGAAG | 639 | 54 |
| 12R | Forward | CTAGCGAACGTATTTCTCC |     |    |

---
